# Supplementary material
Source: PubMed Central journal article supplement (PMC3489171)

## SUPPLEMENTARY MATERIAL

### Probing the Determinants of Diacylglycerol Binding Affinity in C1B domain of Protein Kinase C $\alpha$

Mikaela D. Stewart\*, Brittany Morgan<sup>#</sup>, Francesca Massi<sup>#†</sup>, and Tatyana I. Igumenova<sup>\*†</sup>

\*Department of Biochemistry and Biophysics, Texas A&M University, 300 Olsen Boulevard,  
College Station, TX 77843.

<sup>#</sup>Department of Biochemistry and Molecular Pharmacology, 364 Plantation Street, University of  
Massachusetts Medical School, Worcester, MA 01605.

<sup>†</sup>Corresponding authors.

E-mail: [tigumenova@tamu.edu](mailto:tigumenova@tamu.edu); Phone: (979) 845 6312; Fax: (979) 845 4946.

E-mail: [Francesca.Massi@umassmed.edu](mailto:Francesca.Massi@umassmed.edu); Phone: (508) 856 4501; Fax: (508) 856 6464.

## Overexpression and Purification of C1B $\alpha$

The expression of SUMO-C1B $\alpha$  fusion proteins was induced with 0.5 mM IPTG (isopropyl  $\beta$ -D-1-thiogalactopyranoside, purchased from Fisher Scientific) overnight at 15 °C. For natural abundance protein preparations, the cells were induced upon reaching OD<sub>600</sub> of 0.6-0.8. Isotope labeling of C1B $\alpha$  was accomplished using the method of Marley et al.<sup>1</sup> The method involved re-suspending cells grown on Luria-Bertani broth in M9 minimal medium, supplemented with 3 g/L of [<sup>13</sup>C-6]-D-glucose and 1 g/L of <sup>15</sup>NH<sub>4</sub>Cl (Cambridge Isotopes), and inducing over-expression at OD<sub>600</sub> of 1.8-2.0. Fractionally deuterated protein samples were produced using M9 minimal media containing 75% <sup>2</sup>H<sub>2</sub>O, 3 g/L of [<sup>13</sup>C-6]-D-glucose, and 1 g/L of <sup>15</sup>NH<sub>4</sub>Cl. The cells were harvested by centrifugation at 4 °C and lysed at room temperature using a B-PER protein-extraction reagent (Thermo Scientific). The fusion protein was purified using a HisTrap™ HP Ni affinity column (GE Healthcare Life Sciences). The fractions containing fusion protein were pooled and desalted on HiPrep 26/10 desalting column (GE Healthcare Life Sciences) into a buffer containing 20 mM Tris and 150 mM NaCl at pH 7.0. SUMO was cleaved from C1B $\alpha$  with histidine-tagged SUMO protease at 30 °C in the presence of 1 mM 1,4-Dithiothreitol (DTT). The products of SUMO protease cleavage reaction were loaded onto the HisTrap™ HP Ni affinity column, and the C1B $\alpha$  was collected in the flow-through fractions. The final purification step was a gel-filtration on a HiPrep 16/60 Sephacryl S-100 column (GE Healthcare Life Sciences) carried out in 50 mM 2-(N-morpholino)ethanesulfonic acid (MES) buffer and 150 mM KCl at pH 6.5.

1. Marley, J., Lu, M. & Bracken, C., A method for efficient isotopic labeling of recombinant proteins, *J. Biomol. NMR* **20** (2001), pp. 71-75.

**Figure S1.** Chemical shift perturbation analysis of DOG binding to wt and Y123W C1B $\alpha$ . The chemical shift differences for the  $^{15}\text{N}$  and  $^1\text{H}$  nuclei of the protein backbone were calculated from the spectra shown in Figure 1.  $\beta 12$  and  $\beta 34$  loop regions are shaded. The largest chemical shift changes are observed in the loops and their hinges, indicating that DOG binding affects the conformation of the loops.

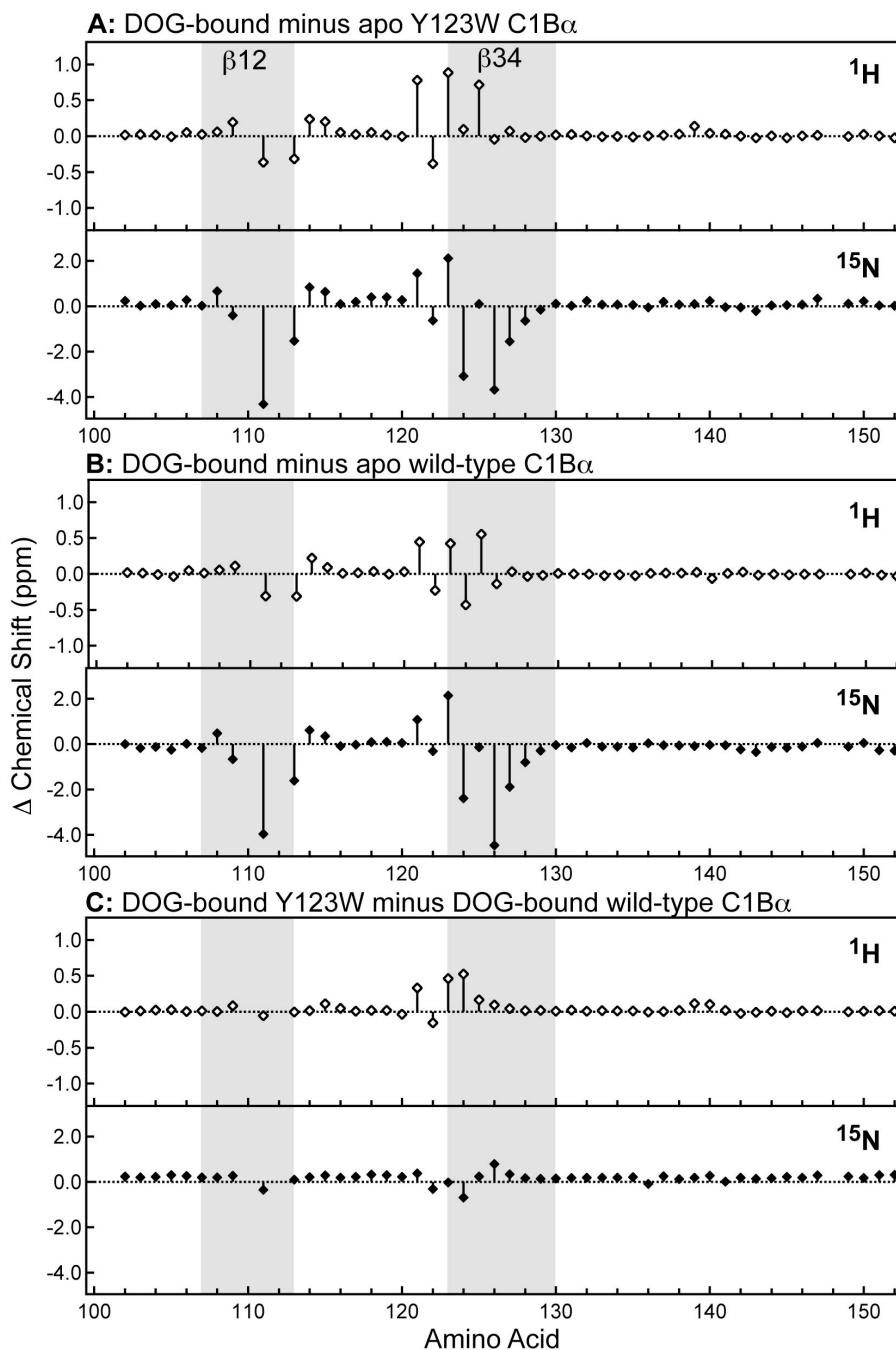

**Figure S2.** Comparison of the  $^{15}\text{N}$ - $^1\text{H}$  HSQC spectra of the apo-forms of wt and Y123W C1B $\alpha$ . The cross-peaks for the wt and mutant protein overlap almost exactly, with the exception of the mutation site. The data indicate that the mutation introduces a very minor structural perturbation, as is expected for a solvent-exposed residue such as Tyr123. Asn and Gln side-chain resonances are labeled with asterisks. Residues that show quantifiable dispersion in rotating-frame relaxation experiments are labeled according to the following scheme: dynamic in both wt and Y123W C1B $\alpha$  (italicized/bold, blue); wt only (italicized); and Y123W C1B $\alpha$  (italicized/bold). Residues for which we observed minor chemical shift changes are labeled with a regular font.

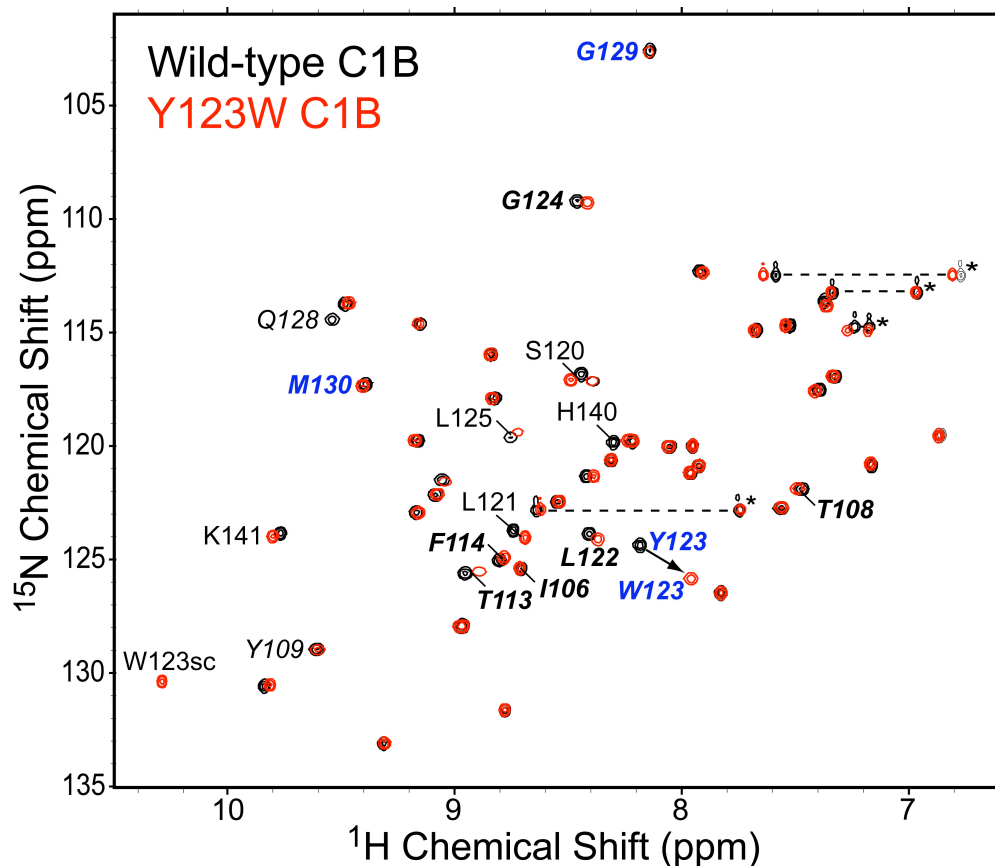



**Figure S4.** A plot of  $R_{ex}$  values obtained in the model-free analysis of wt and Y123W C1B $\alpha$ . Eight residues in wt (Tyr109, Tyr123, Gly124, Leu125, Gln128, Gly129, Met130, and Ser149) and thirteen residues in Y123W C1B $\alpha$  (Thr108, Tyr109, Thr113, Phe114, Leu122, Gly124, Leu125, His127, Gln128, Gly129, Met130, Val147, and Ser149) were fit with Models 3 and 4, which explicitly account for the contribution of chemical exchange to the observed relaxation rates. The differences in the conformational dynamics are pronounced for the hinges of ligand-binding loops  $\beta$ 12 and  $\beta$ 34.

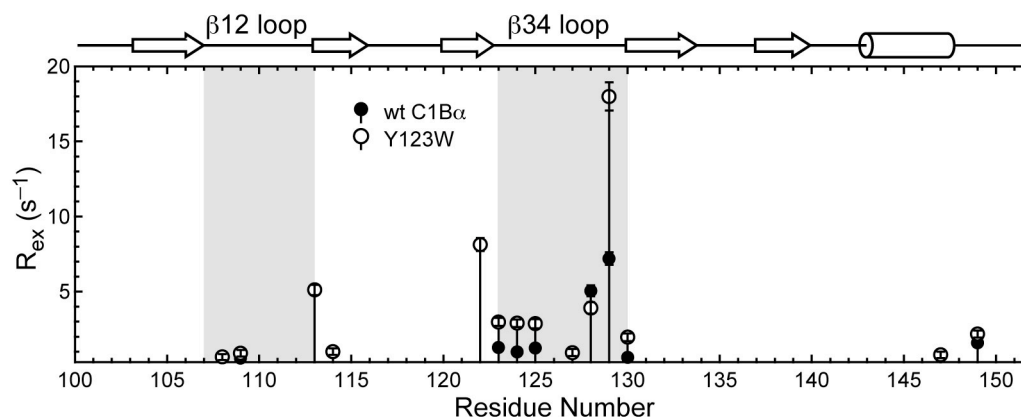

**Figure S5.** A plot of  $\Phi_{ex}$  values in Y123W versus wt C1B $\alpha$  for three residues that show quantifiable dispersion in both proteins. The slope of the fitted line is  $1.73 \pm 0.03$ . The population of the excited state is small ( $< 10$ - $15$  %), based on the similarities of population-averaged chemical shifts between the wt and Y123W C1B $\alpha$ . We can then neglect the term that scales as  $p_B^2$  and re-write the expression for  $\Phi_{ex}$  (see Eq. (7)) as  $\Phi_{ex} \approx p_B \Delta\omega_N^2$ . Assuming that  $\Delta\omega_N$  values for the wt and Y123W C1B $\alpha$  are similar for these three residues, the slope of 1.73 would represent the 1.73-fold change in the population of the excited state that occurs as a result of the Y123W mutation.

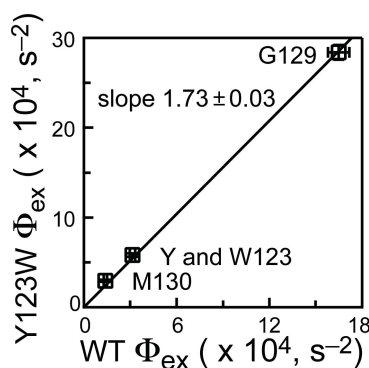

**Figure S6.** Correlation between the loop tip distance,  $\beta$ 12 loop dihedral angles, and hydrogen bonds in Y123W C1B $\alpha$ . Tip distance (A), dihedral angles of the  $\beta$ 12 loop (B), and hydrogen bonds (C) are plotted as a function of time in a representative Y123W C1B $\alpha$  trajectory. The closed-to-open transition occurs at  $\sim$ 4.2 ns and is shown with a vertical line. In (B), the dihedral angles are shown in blue ( $\psi$ , Gly110), black ( $\varphi$ , Ser111), purple ( $\psi$ , Pro112), and green ( $\varphi$ , Thr113). In (C), the presence of a given hydrogen bond at any time point in the trajectory is indicated with a vertical line. Italics indicate that side chain atoms are involved in the hydrogen bonds. The sidechain of Gln128 is involved in two of the three hydrogen bonds.

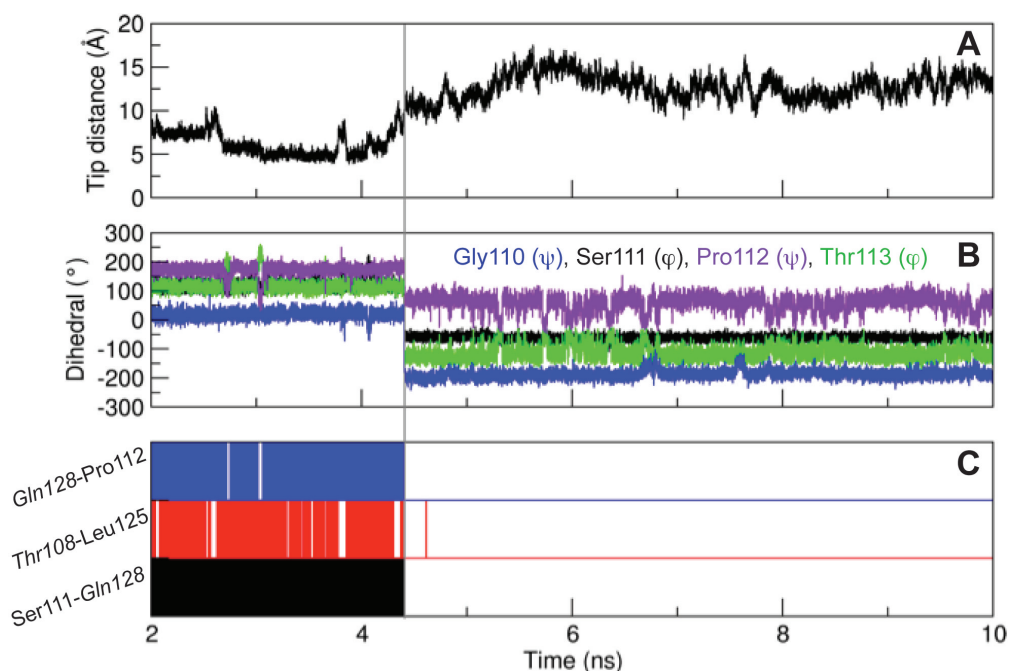

**Table S1.** Probabilities of hydrogen bonds that are correlated with the closed loop conformation. For Y123W C1B $\alpha$ , the probabilities were calculated for the first part of the trajectory (between 2 and 10 ns) where the opening of the binding loops occurs.

| Donor                      | Acceptor      | Y123W C1B $\alpha$ |      |      |                   | Wild-type                         |
|----------------------------|---------------|--------------------|------|------|-------------------|-----------------------------------|
|                            |               | T1 <sup>a</sup>    | T2   | T3   | mean <sup>b</sup> | C1B $\alpha$<br>mean <sup>b</sup> |
| Primary hydrogen bonds     |               |                    |      |      |                   |                                   |
| <i>Thr108</i> <sup>c</sup> | Leu125        | –                  | 0.17 | 0.75 | –                 | Not present                       |
| Ser111                     | <i>Gln128</i> | –                  | 0.30 | 0.76 | –                 |                                   |
| <i>Gln128</i>              | Pro112        | –                  | 0.27 | 0.72 | –                 |                                   |
| Secondary hydrogen bonds   |               |                    |      |      |                   |                                   |
| <i>Gln128</i>              | Leu122        | 0.23               | 0.61 | 0.99 | 0.61 $\pm$ 0.38   | 0.36 $\pm$ 0.44                   |
| Gly129                     | His107        | 0.24               | 0.61 | 0.99 | 0.61 $\pm$ 0.38   | 0.13 $\pm$ 0.06                   |
| Tyr109                     | <i>Gln128</i> | 0.47               | 0.88 | 1.00 | 0.78 $\pm$ 0.28   | 0.51 $\pm$ 0.49                   |

<sup>a</sup> T1, T2, and T3 are the individual trajectories for Y123W C1B $\alpha$ .

<sup>b</sup> The mean probability and error were calculated using data from three trajectories.

<sup>c</sup> Italics indicate sidechain atoms.

**Figure S7.** Sidechain dihedral angles of Gln128 in wt and Y123W C1B $\alpha$ . The angles are shown as a function of time for three trajectories (black, green, and red). The range sampled by  $\chi_1$ ,  $\chi_2$ , and  $\chi_3$  indicates high mobility of Gln128 sidechain in both wt and mutant. The  $\chi_3$  dihedral angle defined by C $\beta$ -C $\gamma$ -C $\delta$ -N $\epsilon$  atoms often rotates 360 $^\circ$  in the wt C1B $\alpha$ . The sidechain rotations appear to occur less frequently in the mutant than in the wt.

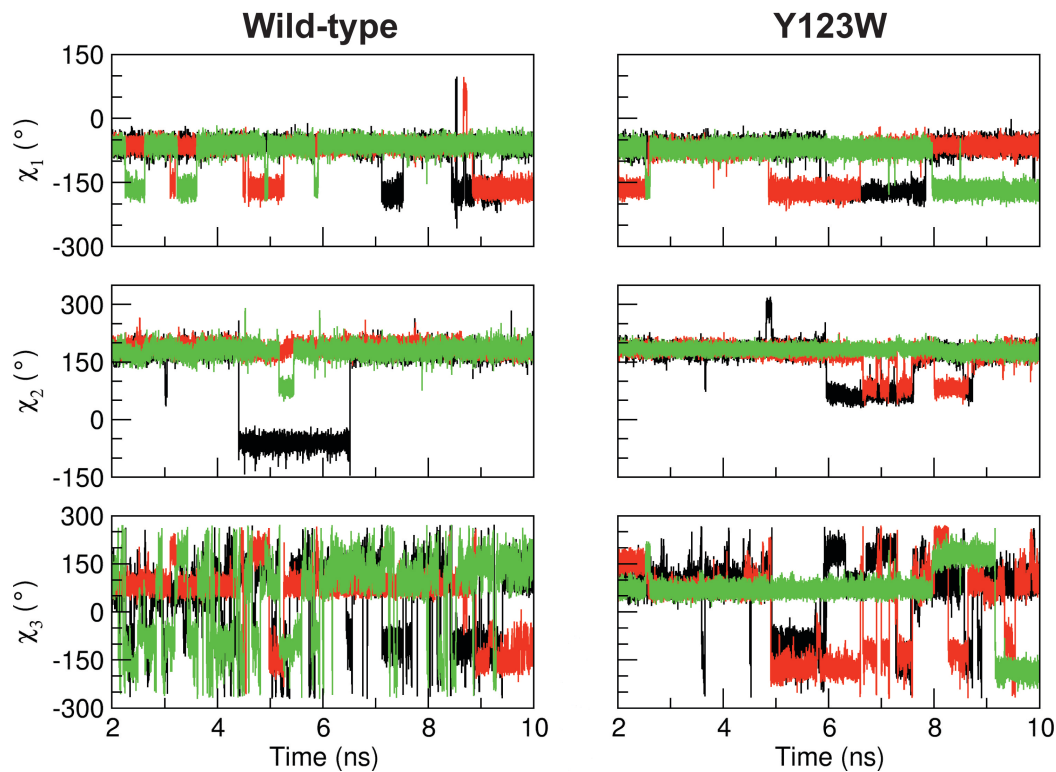

Supplement: NIHMS282926-supplement-01.pdf [file NIHMS282926-supplement-01.pdf]
